# Supplementary material for: Differences in Transporters Rather than Drug Targets Are the Principal Determinants of the Different Innate Sensitivities of Trypanosoma congolense and Trypanozoon Subgenus Trypanosomes to Diamidines and Melaminophenyl Arsenicals
Source: MDPI journal article supplement (doi:10.3390/ijms23052844), 2022-03-05
Supplement: s1 [file s1]

Table S1. List of primers

| Primer               | Primer sequence                                        | Function                              |
|----------------------|--------------------------------------------------------|---------------------------------------|
| HDK1575              | GTCTGACATGCAGAGCCAACCAGAC                              | Forward primer for TbAQP2             |
| HDK1576              | GGATCCTTAGTGTGGAAGAAA                                  | Reverse primer for TbAQP2             |
| HDK1773              | CAAAAGAAATACCACTTTTCGCTACAAGATCTATGCTCGGGTTTGACTCA     | Forward primer for TbAT1              |
| HDK1774              | CATAATCCGGTACATCATAACGGATAGGATCCCTTGGGAAGCCCCTCATG     | Reverse primer for TbAT1              |
| HDK1775              | CAAAAGAAATACCACTTTTCGCTACAAGATCTATGAGCAGCACAGACATG     | Forward primer for TbMFST             |
| HDK1776              | CATAATCCGGTACATCATAACGGATAGGATCCAGTTCGTGATTTTCGCTTTGTC | Reverse primer for TbMFST             |
| HDK1573 <sup>a</sup> | TTTCGCTACAagatctATGAAAGTTATATCGTAC                     | Mutagenesis of pHDK273 plasmid        |
| HDK1574              | GTGGTATTTCTTTTGGTAAATCG                                | Mutagenesis of pHDK273 plasmid        |
| MBP119               | CATCCTCAAACACTTACTCCG                                  | Forward primer for pMB-DP-012 plasmid |
| MBP120               | GCTTGTGCTGATACCTGGAG                                   | Reverse primer for pMB-DP-012 plasmid |

<sup>a</sup> lower case bases indicate the site of the intended mutation
